# Supplementary material for: House Dust Mite Induces Bone Marrow IL-33-Responsive ILC2s and TH Cells
Source: MDPI journal article supplement (doi:10.3390/ijms21113751), 2020-05-26
Supplement: s1 [file s1]

**Supplementary table 1.** Antibodies used in flow cytometry

| Antigen (clone)                                                                                                                 | Format | Manufacturer            | Dilution      |
|---------------------------------------------------------------------------------------------------------------------------------|--------|-------------------------|---------------|
| <b>Hematopoietic Lineage cocktail: CD3 (17A2), CD45R/B220 (RA3-6B2), CD11b (M1/70), TER-119 (TER-119), Ly-G6/Gr-1 (RB6-8C5)</b> | FITC   | ThermoFisher Scientific | 20 µl/test    |
| CD11c (N418)                                                                                                                    | FITC   | ThermoFisher Scientific | 0.05 µg/test  |
| CD19 (1D3)                                                                                                                      | FITC   | BD Bioscience           | 0.25 µg/test  |
| NK-1.1 (PK136)                                                                                                                  | FITC   | BD Bioscience           | 0.5 µg/test   |
| FcεR1 (MAR-1)                                                                                                                   | FITC   | ThermoFisher Scientific | 0.125 µg/test |
| CD34 (RAM34)                                                                                                                    | FITC   | BD Bioscience           | 0.5 µg/test   |
| CD3 (145-2C11)                                                                                                                  | FITC   | BD Bioscience           | 0.5 µg/test   |
| CD127/IL-7Ra (A7R34)                                                                                                            | PE     | ThermoFisher Scientific | 0.25 µg/test  |
| CD125 (T21)                                                                                                                     | PE     | BD Bioscience           | 1 µg/test     |
| CD4 (H129.19)                                                                                                                   | PE     | BD Bioscience           | 0.5 µg/test   |
| CD45 (30-F11)                                                                                                                   | PerCP  | BD Bioscience           | 0.2 µg/test   |
| ST2/IL-33R (RMST2-2)                                                                                                            | APC    | ThermoFisher Scientific | 0.25 µg/test  |
| Siglec-F (E50-2440)                                                                                                             | AF647  | BD Bioscience           | 0.2 µg/test   |
| CD25/IL-2RA (PC61)                                                                                                              | BV421  | BD Bioscience           | 0.2 µg/test   |
| CD193/CCR3 (J073E5)                                                                                                             | BV421  | BioLegend               | 0.25 µg/test  |
| IL-5 (TRFK5)                                                                                                                    | BV421  | BioLegend               | 0.25 µg/test  |
| Isotype control IL-5/Rat IgG1, κ (RTK2071)                                                                                      | BV421  | BioLegend               | 0.25 µg/test  |
